# Supplementary material for: Complete degradation of dimethyl phthalate by biochemical cooperation of the Bacillus thuringiensis strain isolated from cotton field soil
Source: Royal Society of Chemistry journal article supplement (doi:10.1039/c4ra09465d), 2014-01-01
Supplement: c4ra09465d1.pdf [file c4ra09465d1.pdf]

**Table** Physico-chemical properties of soil samples

| <b>Soil properties</b>                                | <b>Values<br/>obtained</b> |
|-------------------------------------------------------|----------------------------|
| pH                                                    | 7.91                       |
| EC ( $\mu\text{S cm}^{-1}$ )                          | 20.8                       |
| TDS ( $\text{mg L}^{-1}$ )                            | 10                         |
| Salinity ( $\text{g L}^{-1}$ )                        | 0.0                        |
| Organic carbon %                                      | 1.208                      |
| Moisture %                                            | 18.48                      |
| Microbial biomass<br>carbon ( $\mu\text{g ml}^{-1}$ ) | 86.423                     |
